# Supplementary material
Source: Springer Nature journal article supplement (https://www.springermedizin.de/resource/supplementary/12879_2005_260_MOESM3_ESM.pdf/9448300)
Supplement: MOESM3 [file 9448300]

**Table 3** Associations of socio-demographic and health service factors with health systems' delay

| Characteristics           | Delay<br>>16 days | No delay<br>≤15 days | Crude<br>OR (95%CI) | Adjusted<br>OR (95%CI) |
|---------------------------|-------------------|----------------------|---------------------|------------------------|
| <b>Sex</b>                |                   |                      |                     |                        |
| Male                      | 117               | 85                   | 1.00                | 1.00                   |
| Female                    | 103               | 79                   | 0.95 (0.63, 1.42)   | 0.73 (0.44, 1.21)      |
| <b>Age</b>                |                   |                      |                     |                        |
| 15-24                     | 63                | 64                   | 1.00                | 1:00                   |
| 25-44                     | 133               | 83                   | 1.65(1.08, 2.58) *  | 1.62 (0.98, 2.61)      |
| >45                       | 24                | 17                   | 2.76 (1.33, 5.72)*  | 1.30 (0.59, 2.90)      |
| <b>Marital status</b>     |                   |                      |                     |                        |
| Single                    | 79                | 55                   | 1:00                | 1:00                   |
| Divorced                  | 52                | 37                   | 0.97 (0.56, 1.68)   | 1.12 (0.61, 2.05)      |
| Married                   | 76                | 64                   | 0.83 (0.51, 1.33)   | 0.91 (0.51, 1.64)      |
| Widowed                   | 13                | 8                    | 1.13 (0.94, 2.91)   | 1.12 (0.38, 3.26)      |
| <b>Occupation</b>         |                   |                      |                     |                        |
| Farmers                   | 46                | 58                   | 1.00                |                        |
| Housewives                | 26                | 60                   | 1.80 (1.00, 3.33)   | 2.16 (0.84, 5.5)       |
| Civil servants            | 31                | 28                   | 0.71 (0.37, 1.36)   | 0.74 (0.26, 2.17)      |
| Students                  | 17                | 18                   | 0.84 (0.39, 1.80)   | 0.68 (0.24, 1.93)      |
| Unemployed                | 23                | 32                   | 1.10 (0.57, 2.13)   | 0.92 (0.37, 2.31)      |
| Self-employed             | 21                | 24                   | 0.90 (0.44, 1.82)   | 0.64 (0.24, 1.70)      |
| <b>Income</b>             |                   |                      |                     |                        |
| No income                 | 73                | 112                  | 1.00                |                        |
| Irregular income          | 50                | 64                   | 0.83 (0.52, 1.33)   | 0.91 (0.43, 1.94)      |
| Income 1-300birr          | 14                | 22                   | 1.00(0.49, 2.13)    | 1.62 (0.61, 4.18)      |
| >301                      | 27                | 22                   | 0.53 (0.28, 1.00)   | 0.54 (0.19, 1.48)      |
| <b>Residence</b>          |                   |                      |                     |                        |
| >10Km                     | 90                | 78                   | 1.00                | 1.00                   |
| ≤10Km                     | 130               | 86                   | 1.31 (0.87, 1.97)   | 2.01 (1.22, 3.48) *    |
| <b>Education</b>          |                   |                      |                     |                        |
| Illiterate                | 90                | 67                   | 1.00                | 1.00                   |
| 1-8 <sup>th</sup> grade   | 85                | 60                   | 1.06 (0.67, 1.67)   | 1.00 (0.59, 1.69)      |
| 9 <sup>th</sup> and above | 45                | 37                   | 0.90 (0.53, 1.55)   | 0.64 (0.33, 1.23)      |
| <b>Medical provider</b>   |                   |                      |                     |                        |
| Health center             | 79                | 84                   | 1.00                | 1.00                   |
| Health post               | 57                | 20                   | 3.03 (1.67, 5.49) * | 3.90 (2.06, 7.64) *    |
| Hospital                  | 23                | 29                   | 0.84 (0.45, 1.58)   | 0.82 (0.41, 1.62)      |
| Private                   | 61                | 31                   | 2.32 (1.23, 3.55) * | 2.32 (1.23, 4.23) *    |

\* Significant at &lt; 0.05

Income group: 1) no income (housewife, students, unemployed); 2) irregular income (farmers); 3) regular income of 1-300 Birr per month (civil servants); 4) regular income of >300 Birr per month (civil servants).
